# Supplementary material for: Identifying desired qualifications, tasks, and organizational characteristics of practice managers—a cross-sectional survey among group practice physicians in Germany
Source: Springer Nature journal article supplement (doi:10.1186/s12913-022-08199-5), 2022-06-24
Supplement: MOESM1 [file 23203310]

**Appendix 1:** A translated questionnaire used to identify desired qualifications, tasks, and organizational characteristics of practice managers as part of the cross-sectional survey among group practice physicians in Germany

| No. | Question                                                                                                                                    | Reply                                                                                                                                                                                                                                                                       |
|-----|---------------------------------------------------------------------------------------------------------------------------------------------|-----------------------------------------------------------------------------------------------------------------------------------------------------------------------------------------------------------------------------------------------------------------------------|
| 1   | A Personal time gain is important for me to employ a practice manager.                                                                      | Yes/No                                                                                                                                                                                                                                                                      |
| 2   | Does your practice have a practice manager?                                                                                                 | Yes/No                                                                                                                                                                                                                                                                      |
| 3   | The practice manager should have previous medical training.                                                                                 | Yes (Free Text for Specification)/No                                                                                                                                                                                                                                        |
| 4   | A PM should also take on medical tasks                                                                                                      | Yes/No                                                                                                                                                                                                                                                                      |
| 5   | Management of materials (purchasing, procurement, inventory management, etc.) is/would be the responsibility of the PM.                     | Yes/No                                                                                                                                                                                                                                                                      |
| 6   | What basic training do you see as necessary qualifications of a practice manager?                                                           | Multiple answers:<br>Medical assistant with special training/Nurse with special training/Experienced business administration specialist/Experienced public administration specialist/Business administration/public Administration specialist/Medical assistant/Nurse/Other |
| 7   | Do you prefer to recruit a practice employee as a PM or external person?                                                                    | Employees of the practice / external person                                                                                                                                                                                                                                 |
| 8   | If an employee of the practice has been selected as practice manager: It is easy to release an employee for training as a practice manager. | fully agree – strongly disagree<br>(6-point scale)                                                                                                                                                                                                                          |
| 9a  | I think a practice manager is important for the practice.                                                                                   | fully agree – strongly disagree<br>(6-point scale)                                                                                                                                                                                                                          |
| 9b  | A practice manager can relieve my workload.                                                                                                 | fully agree – strongly disagree<br>(6-point scale)                                                                                                                                                                                                                          |
| 10  | A practice manager should continuously educate himself or herself.                                                                          | fully agree – strongly disagree<br>(6-point scale)                                                                                                                                                                                                                          |
| 11  | The staff management of non-physicians staff (duty rosters, vacation planning, etc.) is the task of the practice manager.                   | fully agree – strongly disagree<br>(6-point scale)                                                                                                                                                                                                                          |
| 12  | The staff management of physician staff (duty rosters, vacation planning, etc.) is the task of the practice manager.                        | fully agree – strongly disagree<br>(6-point scale)                                                                                                                                                                                                                          |
| 13  | Selection and recruiting of non-physicians staff (interviews, screening of applications) is the responsibility of the practice manager      | fully agree – strongly disagree<br>(6-point scale)                                                                                                                                                                                                                          |
| 14  | Bookkeeping (paying bills and salaries, managing receivables, etc.) is the responsibility of the practice manager.                          | fully agree – strongly disagree<br>(6-point scale)                                                                                                                                                                                                                          |
| 15  | Billing (e.g., track billing for services) is the responsibility of the practice manager.                                                   | fully agree – strongly disagree<br>(6-point scale)                                                                                                                                                                                                                          |
| 16  | Operative coordination of practice procedures (organization of standardized processes,                                                      | fully agree – strongly disagree<br>(6-point scale)                                                                                                                                                                                                                          |

|    |                                                                                                                                                         |                                                    |
|----|---------------------------------------------------------------------------------------------------------------------------------------------------------|----------------------------------------------------|
|    | implementation of regulations and control, etc.) is the task of the practice manager.                                                                   |                                                    |
| 17 | The implementation of quality management (fulfillment of documentation obligations, evaluation of processes, etc.) is the task of the practice manager. | fully agree – strongly disagree<br>(6-point scale) |
| 18 | I have concerns about delegating non-medical tasks.                                                                                                     | fully agree – strongly disagree<br>(6-point scale) |
| 19 | A functioning team does not need a practice manager.                                                                                                    | fully agree – strongly disagree<br>(6-point scale) |
| 20 | How high do you assess the risk of an external practice manager not being accepted by the other employees?                                              | Very high risk – very low risk<br>(6-point scale)  |
| 21 | Sharing a practice manager with other practices makes sense.                                                                                            | Yes/No                                             |
| 22 | How do you estimate the time required for coordination with the practice manager?                                                                       | Time in minutes/day                                |
| 23 | What do you consider a justifiably gross salary for a practice manager per year?                                                                        | Wage in thousand euros                             |
| 24 | From what number of patients per quarter with statutory health insurance do you consider a practice manager to be necessary?                            | Free text (in numbers)                             |
| 25 | From what number of physicians (employed and licensed) do you consider a practice manager to be necessary?                                              | Number – Dropdown<br>(1,2,3,4,5,6,7,8,9,>10)       |
| 26 | From what number of non-physicians (e.g., nurses) do you consider a practice manager to be necessary?                                                   | Number – Dropdown<br>(1,2,3,4,5,6,7,8,9,>10)       |
| 27 | What gender are you?                                                                                                                                    | Male, female, non-binary                           |
| 28 | How old are you?                                                                                                                                        | Number – Dropdown                                  |
| 29 | How many physicians work (including you) in your practice?                                                                                              | Number – Dropdown                                  |
| 30 | How many medical assistants work in your practice?                                                                                                      | Number – Dropdown                                  |
| 31 | How many other employees (e.g., cleaners) work in your practice?                                                                                        | Number – Dropdown                                  |
| 32 | How many years of experience do you have working <sup>3</sup> in practices?                                                                             | Number – Dropdown                                  |
| 33 | Which specialist title do you hold?                                                                                                                     | Selection of medical specialties                   |
| 34 | Beyond the questions, do you have any points you would like to share regarding the topic?                                                               | Free text                                          |
